1 **Ageing in house sparrows is insensitive to**  
2 **environmental effects**

3  
4 **Mirre J. P. Simons<sup>1</sup>, Isabel Winney<sup>1,3</sup>, Antje Girndt<sup>3</sup>, Mark Rees<sup>1</sup>, Shinichi**  
5 **Nakagawa<sup>1,4</sup>, Julia Schroeder<sup>2\*</sup>, Terry Burke<sup>1\*</sup>**

6  
7  
8 <sup>1</sup> Department of Animal and Plant Sciences, University of Sheffield, Sheffield, S10  
9 2TN, UK

10 <sup>2</sup> Department of Life Sciences, Imperial College London, London, SW7 2AZ, UK

11 <sup>3</sup> Evolutionary Biology, Max Planck Institute for Ornithology, Seewiesen, DE-  
12 82319, Germany

13 <sup>4</sup> Evolution & Ecology Research Centre and School of Biological, Earth and  
14 Environmental Sciences, University of New South Wales, Sydney, NSW 2052,  
15 Australia

16  
17 **\*shared last author**

18  
19 **Running title:** Ageing in wild and captive sparrows

20  
21 **Keywords:** Senescence, mark-recapture, demography, wild, *Passer domesticus*,  
22 evolution, ecology, island, mortality, aging

23  
24 **Word count main text:** 3,718

25  
26 **Number of references:** 57

27  
28 **Number of figures:** 4

29  
30 **Number of tables:** 3

31  
32 **Correspondence to:** Mirre Simons, Department of Animal and Plant Sciences,  
33 University of Sheffield, Sheffield, S10 2TN, UK  
34 Email: [m.simons@sheffield.ac.uk](mailto:m.simons@sheffield.ac.uk)

## 35 **Abstract**

36 Variation in individual life histories, and physiology, determines the rates at  
37 which new life is generated (reproduction) and lost (death) in a population.  
38 Studying the demography of deaths thus reveals fundamental aspects of the  
39 biology of individuals within a population. We studied mortality senescence – the  
40 increase in mortality rate with age – in wild and captive house sparrows (*Passer*  
41 *domesticus*), and demonstrate highly similar mortality senescence in both, but  
42 markedly lower vulnerability to death (frailty) in captivity. This suggests that  
43 house sparrows have a species-specific rate of ageing that is insensitive to  
44 environmental effects. Unexpectedly, juvenile and adult mortality co-varied  
45 positively across years in the wild, indicating that mortality is not strongly  
46 density-dependent. Mortality also varied widely among years, suggesting a  
47 strong environmental effect, and we explain the observed patterns using  
48 temperature data and predation by birds of prey. We discuss how stochastic  
49 environmental effects can affect the evolution of ageing.

50

## 51 **Introduction**

52 Demography can reveal unique aspects of the biology of the individuals within a  
53 population<sup>1-5</sup>. An interest in the demography of wild populations has recently  
54 been ignited<sup>6-8</sup>, driven by the question of whether wild animals show  
55 senescence. Historically, senescence was presumed to be minimal in the wild,  
56 swamped by extrinsic mortality (e.g. predation, disease, accidents, harsh  
57 weather) such that very few individuals in the wild would live long enough to  
58 show senescence<sup>8,9</sup>. This hypothesis has now been falsified by studies in a  
59 multitude of wild populations in which evidence has been found for both  
60 reproductive and mortality senescence<sup>8,10,11</sup>. In many of these studies the  
61 confounding effect of an unknown rate of dispersal with age is an important  
62 limitation, with dispersal being mistaken for mortality. The number of studies of  
63 age-specific survival remains, however, severely limited, especially compared to  
64 the many on reproductive senescence. Studying both factors together can  
65 provide a unique contribution to understanding the evolution of senescence in a  
66 comparative context<sup>7,8</sup>. Recent comparisons of mortality trajectories across  
67 species have revealed a wide range of patterns, from negligible senescence to a  
68 rapid acceleration in mortality with age, and this variation currently remains  
69 largely unexplained<sup>12</sup>.

70

71 Variation in mortality trajectories among species can result from differences in  
72 physiology and also from environmental effects and their interactions with  
73 physiology<sup>13</sup>. The demography of death records reveals two main components:  
74 the increasing risk of death with age – the ageing rate – and frailty, the

75 vulnerability to death from ageing-related causes<sup>14–16</sup>. These parameters have  
76 both genetic and environmental components. Studies on insects, utilizing the  
77 advantage of obtaining many related offspring within a lineage, have reported  
78 heritability for both these parameters<sup>1,17</sup>. Another approach is to estimate the  
79 scope for environmental effects by comparing different populations of the same  
80 species or comparing mortality in the wild with that in captivity. Baboons (*Papio*  
81 *hamadryas*) in two different wild populations and a captive population have  
82 been shown to have different levels of frailty, yet to show a highly similar rate of  
83 ageing<sup>18</sup>. Similarly, the recent gain in human lifespan<sup>19</sup> is due to a reduction in  
84 frailty, rather than a change in ageing rate<sup>20</sup>. Together, these studies suggest that  
85 there are both environmental and genetic determinants of frailty. Environmental  
86 effects on ageing rate are less common, although diet has been shown to  
87 modulate ageing rate in rodents<sup>16</sup>.

88

89 The underlying physiology of differential adult mortality trajectories, and  
90 especially the magnitude of the latter compared to juvenile mortality, results  
91 from selection pressures shaped by life-history trade-offs. Adult and offspring  
92 mortality risks are expected to be traded-off with the costs of reproduction,  
93 determining, for instance, the optimal clutch size and effort that should be  
94 invested in provisioning<sup>21</sup>. Interestingly, separating juvenile and adult survival is  
95 not usually possible because of dispersal in non-closed populations<sup>22,23</sup>. This  
96 limits our ability to understand the connection between demography and life-  
97 history trade-offs, and also to detect and quantify the density dependence of  
98 population dynamics<sup>22</sup>. For example, it would be difficult in a non-closed

99 population to separate an effect of density on survival from an effect on density-  
100 dependent dispersal.

101

102 Here, we study the demography of an exceptionally well-monitored, closed  
103 island population<sup>24,25</sup>, and also of a captive population, of house sparrows<sup>26</sup>  
104 (*Passer domesticus*) to (i) compare mortality senescence in the wild and in  
105 captivity. We also (ii) assess the effect of the environment on adult mortality and  
106 juvenile recruitment in the wild, factors that we were able to separate reliably  
107 due to the near-perfect resighting rate, comprehensive coverage of breeding  
108 attempts on the island, and negligible rates of immigration and emigration<sup>24,27</sup>.

109

## 110 **Methods**

### 111 **Study populations**

112 Monitoring of the house sparrows on Lundy Island (51.10° N, 4.40 W°), England,  
113 began in 1990 and has been undertaken systematically since 2000; data are  
114 presented here for the period 2000–2012. Every year, breeding behaviour in and  
115 outside nestboxes is monitored and birds are trapped using mistnets during each  
116 winter (Nov–Feb). Captures include those by researchers focusing on sparrows  
117 specifically, and those caught by the Lundy Field Society during bird surveys.  
118 Individuals are ringed before fledging with individual metal rings and a unique  
119 combination of colour rings, allowing sightings without actual captures, and  
120 individuals are sampled for blood as chicks and adults for genetic parentage  
121 analyses<sup>10,28</sup>. To estimate the population size and resighting probability in our  
122 study population we used actual catches<sup>25</sup>, *ad libitum* sightings during the

123 breeding season and winter, structured sightings from social parentage  
124 assignment of broods using video recording<sup>27</sup> and genetic sightings (genetic  
125 parentage assignment to offspring, except for the last year included, 2012, for  
126 which pedigree information was not yet available at the time of analysis). We  
127 assessed juvenile survival for all nestlings that received a metal British Trust for  
128 Ornithology ring, which they were given at an age of *ca* 12 days to focus on post-  
129 fledging survival, and we disregarded earlier deaths in the nest. Lundy is a small  
130 island (< 5.0 km long and 0.7 km wide) and is 19 km from the closest mainland  
131 shoreline, which limits dispersal from and to the island to almost non-existent<sup>24</sup>.  
132 The habitat on Lundy consists of a small village and farm surrounded mostly by  
133 grassland and cliffs, but with a small wooded valley. The sparrows are almost  
134 exclusively restricted to the village and the adjacent wooded valley; an excess of  
135 nestboxes was available throughout the study area. Predators consisted of  
136 occasional birds of prey that pass through during migration or, occasionally,  
137 become resident on the island in winter (see below).

138

139 The captive population of sparrows was maintained at the Max Planck Institute  
140 for Ornithology (Seewiesen, Germany) from 2005 (results include data on  
141 mortality up to 2014). Individuals were originally captured from the wild in rural  
142 Bavaria, Germany and subsequently maintained in aviaries. A proportion of the  
143 offspring born in captivity were maintained in the population and inbreeding  
144 was avoided as much as possible by transferring birds among aviaries. All birds  
145 were individually ringed and mortality was monitored daily. The specific  
146 husbandry of the birds and previous research has been described elsewhere<sup>26,29</sup>.

147 The captive dataset consisted of 304 adult birds, including 170 individuals that  
148 were still alive and were therefore right-censored.

149

### 150 **Mortality trajectory and resighting probability**

151 We used Bayesian Survival Trajectory Analysis (BaSTA, 1.9.2) implemented in  
152 R<sup>30,31</sup>. BaSTA uses a Monte Carlo Markov Chain algorithm combining Metropolis  
153 sampling for survival parameters and latent states (when times of birth or death  
154 are unknown) in a mark–recapture framework. Mark–recapture models use the  
155 missed observations of individuals known to be alive at the point of missed  
156 observation (i.e. they are observed later) to estimate the probability that an  
157 individual is sighted in the population. BaSTA combines such mark–recapture  
158 probability modelling with fitting the mortality/survival trajectory.

159

160 We fitted Gompertz and Logistic models with a bathtub shape<sup>30,32</sup>. Gompertz and  
161 Logistic models differ, in that Logistic models allow the mortality rate to plateau  
162 at advanced ages, whereas under the Gompertz law mortality rate continuously  
163 accelerates exponentially with age<sup>30,32</sup>. An increase in mortality rate with age is  
164 evidence for senescence. A bathtub shape (declining Gompertz, see equation 1)  
165 allowed early mortality, from the nestling state to adulthood, to be modelled. We  
166 selected the best model based on the deviance information criterion (DIC, which  
167 behaves similarly to AIC), and checked convergence by running each chain eight  
168 times, with each individual chain run for 1,000,000 iterations, with a burnin of  
169 2,000 and thinning interval of 2,000. Autocorrelations of the chain were below  
170 0.045 for all parameters in all models run. We included sex as a categorical  
171 covariate (allowing mortality parameters to vary between the sexes) in the

172 models, because sex differences in longevity are prevalent across the animal  
173 kingdom<sup>33</sup>. The inclusion of this covariate might therefore improve the fit of the  
174 BaSTA model and thus the estimation of the re-sighting probability and  
175 parametric survival models. The significance of the inclusion of sex as a covariate  
176 was judged using the Kullback–Leibner divergence calibration<sup>11,30</sup>, which ranges  
177 from 0.5 to 1, with 0.5 indicating identical posterior distributions, and hence no  
178 effect of the covariate. We included known birth years (i.e. observed as a chick),  
179 where possible, for 2,297 of the 2,514 individuals included, for which we had  
180 1,750 re-sightings available in 2000–2012. Known death years were included  
181 from recoveries made in the field (for 155 individuals). Sighting years were  
182 coded from 1 March until 29 February in the following year in order to include  
183 sightings up to the start of the next breeding season. Mortality trajectories in the  
184 captive population were fitted using the package ‘flexsurv’ in R in a maximum-  
185 likelihood framework<sup>34</sup>. Individuals that died as a result of accidents in the  
186 population, and those still alive, were right-censored. We only fitted adult  
187 mortality, because data for juvenile (under one year old) mortality were not  
188 complete, because this was not always recorded in the required detail. The  
189 parametric models fitted were limited to a Gompertz without any covariates,  
190 because in the smaller captive dataset the Logistic model did not converge and  
191 mortality deceleration was not evident in the raw data. For a direct comparison  
192 with the wild population, a simple Gompertz without the bathtub structure was  
193 also fitted in ‘flexsurv’ to the Lundy data.

194

195

196



197 
$$h(t) = e^{a_0 - a_1 * t} + c + e^{b_0 + b_1 * t}$$

198

199 **Equation 1.** Hazard (mortality) function of the Gompertz bathtub  
200 model<sup>30</sup>. The first part of the equation ( $a_0, a_1, c$ ) models the decline  
201 in mortality from early ages to adulthood. The increase in mortality  
202 with age is modelled by the second part of the equation, with  $b_0$   
203 modelling the relative vulnerability to the increase in mortality  
204 (frailty) per  $t$ , as defined by the  $b_1$  parameter (ageing rate).

205

206 
$$h(t) = e^{a_0 - a_1 * t} + c + \frac{e^{b_0 + b_1 * t}}{1 + b_2 * \frac{e^{b_0}}{b_1} * (e^{b_1 * t} - 1)}$$

207

208 **Equation 2.** Hazard (mortality) function of the Logistic bathtub  
209 model<sup>30</sup>. The logistic model converges to the Gompertz model  
210 when parameter  $b_2$ , which allows mortality to decelerate with age,  
211 approaches zero.

212

## 213 **Predictors of mortality in the Lundy population**

### 214 **Temperature data**

215 We explored the relationships between the mortality of juveniles and resident  
216 adults with temperature. Minimum daily temperature data were obtained from  
217 the Meteorological Office (UK) for the weather station at RAF Chivenor (51.1° N,  
218 4.1 W°, the closest official weather station to Lundy, 35 km to the east). We  
219 expected low temperatures to induce mortality. As a measure of how cold a year  
220 was, we used the number of days per census year (from April to March, as above)

221 that had a minimum temperature below the lower daily minimum temperature  
222 quartile across the years 1999 to February 2012 (i.e.  $\leq 4.6^{\circ}\text{C}$ ).

223

#### 224 **Presence of birds of prey**

225 To assess a possible relationship between juvenile or adult mortality and the  
226 number of predators on the island, data on sightings of specified birds of prey  
227 were used to construct a predator index for each census year. Sightings of these  
228 species are routinely recorded by permanent island staff, members of the Lundy  
229 Field Society and visitors to the island, and are collated into monthly sighting  
230 numbers. We derived an annual index of all the sightings in each census year of  
231 sparrowhawk (*Accipiter nisus*), merlin (*Falco columbarius*), hobby (*Falco*  
232 *subbuteo*) and kestrel (*Falco tinnunculus*) as the sum of the months in which  
233 there were at least two sightings of a species, divided by 48 (4 species times 12  
234 months). This predator index therefore represents the relative proportion of a  
235 census year for which the population was at risk of predation. These raptor  
236 species commonly visit Lundy during migration, but in some years remain as  
237 residents, and their presence was therefore chosen as a proxy of the predation  
238 pressure acting on the population. All four species are known predators of house  
239 sparrows. In the case of the kestrel, which is generally known to have a  
240 preference for vole species, it is known that the species switches its diet towards  
241 passerines almost exclusively when the availability of small mammalian prey is  
242 reduced<sup>35</sup>. The only small mammal currently present on Lundy is the pygmy  
243 shrew (*Sorex minutus*), following the successful eradication of rats on the island  
244 in 2002–2004.

245

246 **Statistical model**

247 In order to separate the potentially shared covariance among the independent  
248 variables tested against mortality in the population, and to also correct for  
249 changes in age demography affecting adult mortality in a census year, linear  
250 mixed effects binomial models were fitted in 'lme4' in R. Two models were fitted,  
251 one for juvenile and another for adult mortality, that included a random  
252 intercept term for census year of the study and fixed terms for the three  
253 independent variables considered. For adult mortality, the effect of age on  
254 mortality was fitted as a factor, given the non-linear nature of this relationship  
255 (Figure 1), and individuals aged over 5 years were pooled into a single category  
256 to aid model convergence.

## 257 **Results**

258

### 259 **Mortality trajectories and resighting probability**

260 The Logistic model fitted the Lundy data best (Table 1,  $\Delta$ DIC 32.9). The  
261 magnitude of the  $b_2$  parameter, with its 95% CI well above zero, indicated that  
262 mortality levelled off at the oldest ages, probably contributing to the superior fit  
263 of the Logistic model over the Gompertz model. There was no difference in the  
264 mortality trajectory between the sexes; Kullback–Leibner divergence  
265 calibrations remained very close to 0.5 for all parameters (range: 0.50–0.61).  
266 Mortality dropped steeply for adults that recruited into the population and there  
267 was a moderate acceleration in mortality with age, as indicated by the  
268 significantly positive values of the  $b_1$ , the ageing rate parameter, in both the  
269 Logistic and Gompertz models (Table 1).

270

271 Estimated recapture probabilities were close to saturation and highly similar  
272 across all models (deviation of 0.001), with very narrow confidence intervals (for  
273 the preferred Logistic model = 0.96, 95% CI 0.95–0.97). Mortality in the captive  
274 population was lower and this was due to a change in the frailty parameter, with  
275 a highly similar rate of ageing in captivity and in the wild (Table 2, Figure 2).

276

### 277 **Detailed demography of juvenile and adult mortality**

278 The high re-sighting probability and the near absence of dispersal to and from  
279 the island<sup>24</sup> allowed us to separate juvenile mortality from adult mortality.  
280 Adults were assumed dead if not seen in the next year (ignoring the 4%, based  
281 on the estimated re-sighting probability, that we are expected to miss in each

282 census year) and thus recruited juveniles could be separated from adult survival.  
283 Using this approach, we constructed a detailed picture of juvenile mortality and  
284 adult mortality independently, across the years of our study. Year to year  
285 variation in mortality (Figure 3) was high and statistically significant (logistic  
286 regressions, juvenile:  $\chi^2_{(11)} = 49$ ,  $p < 0.0001$ , adult:  $\chi^2_{(11)} = 105$ ,  $p < 0.0001$ ). Note  
287 that some individual adults are used repeatedly in these analyses because they  
288 were alive in multiple years, creating pseudoreplication; yet, given the relatively  
289 short mean lifespan (Figure 1), we expect these effects to be relatively minimal.  
290 Juvenile and adult mortality covaried positively across years ( $r_s = 0.70$ ,  $p =$   
291  $0.015$ ), indicating that when adult mortality was high, this was also the case for  
292 juveniles (Figure 3).

293

294 To explore any environmental effects on mortality, we investigated the effects of  
295 number of cold days per census year, population size, and predator index on  
296 adult mortality and juvenile mortality (Figure 4). Surprisingly, in cold years,  
297 adult and juvenile mortality was lower ( $r_s = -0.65$ ,  $p = 0.02$ ;  $r_s = -0.52$ ,  $p = 0.08$ ,  
298 respectively). Adult mortality and juvenile mortality were each positively related  
299 to population size (adult + juveniles), but neither relationship reached  
300 significance (adult:  $r_s = 0.27$ ,  $p = 0.39$ ; juvenile:  $r_s = 0.41$ ,  $p = 0.19$ ). Predator  
301 index predicted juvenile ( $r_s = 0.61$ ,  $p = 0.03$ ) and adult mortality ( $r_s = 0.59$ ,  $p =$   
302  $0.04$ ). In the binomial mixed effect models used to pull apart the independent  
303 effects of these three independent variables, predator presence exhibited the  
304 strongest effects, with only this variable reaching significance and then only in  
305 adults (Table 3). This is probably due to the covariance between predator  
306 presence and cold weather ( $r_s = -0.38$ ,  $p = 0.23$ ), because separately each of these

307 parameters did predict mortality significantly or showed a trend for both  
308 juvenile and adult mortality (Table 3).

309

## 310 **Discussion**

### 311 **Actuarial senescence**

312 We detect relatively small but significant mortality senescence ('actuarial  
313 senescence') in wild house sparrows (Figure 1). There was a ~1.6-fold increase  
314 in mortality from its trough at age ~2 to age ~6; in comparison, there is a ~3-  
315 fold increase in mortality rates in a US human population from the age of 60 to  
316 100 years and a ~2.7-fold increase in mortality rate in male mice from the age of  
317 1.4 to 2.9 years<sup>36</sup>. This level of actuarial senescence in the sparrow population is  
318 detected despite strong environmental effects on adult and juvenile mortality.  
319 This is relevant to the evolution of senescence, given that the strength (and  
320 sometimes direction) of selection on life history is changed by the level of  
321 stochastic (environmental) noise<sup>37,38</sup>. Extrinsic mortality shapes optimal  
322 investment in the soma over reproduction (current versus future reproduction  
323 trade-off)<sup>39</sup> and, accordingly, different levels of extrinsic mortality on the  
324 population level lead to different levels of senescence-related mortality<sup>14</sup>. When  
325 this selective pressure – extrinsic mortality – is more variable, selection on  
326 intrinsic, senescence-related, mortality is weaker and hence a larger standing  
327 variation in intrinsic mortality is expected<sup>40</sup>. Moreover, different levels of  
328 stochasticity can also lead to the evolution of differential bet-hedging  
329 strategies<sup>41</sup>.

330 Studies of the fitness costs of senescence<sup>7</sup> and evolutionary theory of ageing<sup>42</sup>  
331 have not considered environmental stochasticity. Different levels of  
332 environmental stochasticity might also explain differences between species in  
333 the demography of fertility and mortality<sup>12,43</sup>. Understanding the effects of  
334 environmental variation in extrinsic mortality on intrinsic mortality and/or their  
335 interactions will be a next step in understanding the evolution of senescence in  
336 the wild. In addition, such considerations might explain why the rates of  
337 reproductive senescence and mortality senescence do not always match<sup>7,14,44,45</sup>,  
338 perhaps because the selective pressures maintaining them are differentially  
339 susceptible to environmental effects. Effects of the developmental environment  
340 on reproductive, but not survival senescence<sup>13</sup> is perhaps an illustration of such  
341 differential environmental effects on life-history traits.

342

### 343 **Environmental effects on the demography of mortality**

344 House sparrows in captivity and in the wild show a highly similar rate of ageing  
345 but differential frailty, consistent with similar comparisons in mammals, namely  
346 baboons<sup>18</sup> and humans<sup>20</sup>. This suggests that the ageing rate is a specific property  
347 of a species, insensitive to environmental effects. An invariable within-species  
348 rate of ageing is fundamental to the compensation law of mortality and the  
349 mortality deceleration that follows from the reliability theory of ageing<sup>16,46,47</sup>.  
350 Although comparative evidence from birds (this study) and mammals<sup>18,20</sup>,  
351 including the mortality deceleration observed in this study and others<sup>4</sup>, now  
352 point in this direction, in contrast, experimental evidence suggests that ageing  
353 rate can be flexible. Dietary restriction in rodents reduces the rate of ageing  
354 without affecting frailty<sup>16</sup>, contrary to, for example, the effect of dietary

355 restriction on mortality in *Drosophila melanogaster*, which is exclusively  
356 attributable to a change in frailty<sup>48,49</sup>. Parental effort also modulates the ageing  
357 rate in the wild, as demonstrated using brood size manipulations in jackdaws  
358 (*Corvus monedula*)<sup>11</sup>, the white-throated sparrow (*Zonotrichia albicollis*)<sup>50</sup>, and  
359 the Seychelles Warbler (*Acrocephalus sechellensis*)<sup>51</sup>. This suggests that, to some  
360 extent, the wide variation in mortality trajectories between species<sup>12</sup> can be due  
361 to differential environmental or population effects<sup>52</sup>. Distinguishing between  
362 captive and wild populations<sup>53,54</sup>, and examining experimental effects on frailty  
363 and ageing rate independently, will be crucial steps towards understanding the  
364 evolution of mortality trajectories and senescence.

365

#### 366 **Juvenile and adult mortality**

367 The high recapture probability we estimated from the BaSTA models allowed for  
368 the separation of juvenile and adult mortality, which in many other study  
369 systems is not possible. Juvenile and adult mortality were also found to be  
370 sensitive to environmental effects, and covaried positively, suggesting that  
371 juveniles and adults died of similar environmental causes. The analysis also  
372 suggests that any density dependent effect is relatively limited, given that adult  
373 survival does not impinge on juvenile mortality. Therefore, food availability and  
374 aggression, resulting from competition for food or mating territories, are  
375 unlikely to limit the population size.

376

377 Indeed, population size in a census year did not impinge strongly on either  
378 juvenile or adult mortality (Table 3, Figure 4). Of the other two environmental  
379 variables, predator presence was most predictive of mortality, especially in



380 adults. When considered separately, cold weather was associated with improved  
381 survival of juveniles and adults. Irrespective of whether this is indirect via  
382 predation pressure, it goes against the usual expectation of harsher winters,  
383 although still relatively mild on Lundy, causing more mortality. Without being  
384 able to attribute causes of death to starvation, disease or directly to predation,  
385 we can only speculate on the roles of physiology and/or ecology in the  
386 relationship between mortality and ambient temperature.

387

388 Intensive monitoring, as in the Lundy house sparrow population, achieving near  
389 perfect re-sighting rates, is key when inferring biology from the demography of  
390 mortality, which is crucial in explaining the evolution<sup>12</sup> and biology<sup>3,55,56</sup> of  
391 ageing. The confounding factors of dispersal and unmarked individuals that are  
392 typical of most study populations would bias such estimates, and can lead to  
393 potentially false conclusions about differences in demography between species  
394 when the degree of these biases differs across study populations and species<sup>12</sup>.

395 Understanding the physiology and evolution of relatively invariable species-  
396 specific ageing rates in the face of strong environmental effects, as we show here  
397 for a bird in addition to existing evidence from mammals, is pivotal to  
398 understanding natural selection on senescence and its physiology.

399

400

401 **Acknowledgements**

402 We thank Ian Cleasby, Duncan Gillespie, Simon Griffith, Yu-Hsun Hsu, Maria  
403 Karlsson, Maria-Elena Mannarelli, Nancy Ockendon and Claire Prosser for their  
404 contributions to the fieldwork. We are grateful to Bart Kempnaers for providing  
405 access to the captive population of house sparrows and for support. We thank  
406 Emmi Schlicht and Silke Laucht from the Kempnaers Group for providing  
407 mortality data for the population, and the animal caretakers for looking after the  
408 birds. We thank the UK Meteorological Office for supplying the daily temperature  
409 data and the Lundy Company staff for their enthusiastic support of our research.  
410 The Lundy Field society and visitors to the island are thanked for recording and  
411 collating sightings of birds on Lundy. Support by the UK Natural Environment  
412 Research Council (NE/J024597/1 and NE/M005941/1 to TB). SN was supported  
413 by a Rutherford Discovery Fellowship (New Zealand) and a Future Fellowship  
414 (Australia). MJPS is supported by a Sir Henry Wellcome Fellowship and a  
415 Sheffield Vice Chancellor's fellowship. TB was supported by a Leverhulme  
416 Fellowship.

- 417 1. Tatar, M. & Carey, J. R. Genetics of Mortality in the Bean Beetle  
418 *Callosobruchus maculatus*. *Evolution (N. Y.)* **48**, 1371 (1994).
- 419 2. Mair, W., Goymer, P., Pletcher, S. D. & Partridge, L. Demography of dietary  
420 restriction and death in *Drosophila*. *Science* **301**, 1731–3 (2003).
- 421 3. Garratt, M., Nakagawa, S. & Simons, M. J. P. Comparative idiosyncrasies in  
422 life extension by reduced mTOR signalling and its distinctiveness from  
423 dietary restriction. *Aging Cell* **15**, (2016).
- 424 4. Barbi, E., Lagona, F., Marsili, M., Vaupel, J. W. & Wachter, K. W. The plateau  
425 of human mortality: Demography of longevity pioneers. *Science* **360**,  
426 1459–1461 (2018).
- 427 5. Metcalf, C. J. E. & Pavard, S. Why evolutionary biologists should be  
428 demographers. *Trends Ecol. Evol.* **22**, 205–212 (2007).
- 429 6. Bronikowski, A. M. *et al.* Aging in the natural world: Comparative data  
430 reveal similar mortality patterns across primates. *Science* **331**, 1325–1328  
431 (2011).
- 432 7. Bouwhuis, S., Choquet, R., Sheldon, B. C. & Verhulst, S. The Forms and  
433 Fitness Cost of Senescence: Age-Specific Recapture, Survival,  
434 Reproduction, and Reproductive Value in a Wild Bird Population. *Am. Nat.*  
435 **179**, E15–E27 (2012).
- 436 8. Nussey, D. H., Froy, H., Lemaître, J. F., Gaillard, J. M. & Austad, S. N.  
437 Senescence in natural populations of animals: Widespread evidence and  
438 its implications for bio-gerontology. *Ageing Res. Rev.* **12**, 214–225 (2013).
- 439 9. Monaghan, P., Charmantier, A., Nussey, D. H. & Ricklefs, R. E. The  
440 evolutionary ecology of senescence. *Funct. Ecol.* **22**, 371–378 (2008).
- 441 10. Schroeder, J., Burke, T., Mannarelli, M. E., Dawson, D. A. & Nakagawa, S.

- 442 Maternal effects and heritability of annual productivity. *J. Evol. Biol.* **25**,  
443 149–156 (2012).
- 444 11. Boonekamp, J. J., Salomons, M., Bouwhuis, S., Dijkstra, C. & Verhulst, S.  
445 Reproductive effort accelerates actuarial senescence in wild birds: an  
446 experimental study. *Ecol. Lett.* **17**, 599–605 (2014).
- 447 12. Jones, O. R. *et al.* Diversity of ageing across the tree of life. *Nature* **505**,  
448 169–173 (2014).
- 449 13. Cooper, E. B. & Kruuk, L. E. B. Ageing with a silver-spoon: A meta-analysis  
450 of the effect of developmental environment on senescence. *Evol. Lett.* **2**,  
451 460–471 (2018).
- 452 14. Ricklefs, R. E. Insights from comparative analyses of aging in birds and  
453 mammals. *Aging Cell* **9**, 273–284 (2010).
- 454 15. Kirkwood, T. B. L. Deciphering death: a commentary on Gompertz (1825)  
455 ‘On the nature of the function expressive of the law of human mortality,  
456 and on a new mode of determining the value of life contingencies’. *Philos.*  
457 *Trans. R. Soc. B Biol. Sci.* **370**, 20140379–20140379 (2015).
- 458 16. Simons, M. J. P., Koch, W. & Verhulst, S. Dietary restriction of rodents  
459 decreases aging rate without affecting initial mortality rate - a meta-  
460 analysis. *Aging Cell* **12**, 410–414 (2013).
- 461 17. Promislow, D. E., Tatar, M., Khazaeli, A. A. & Curtsinger, J. W. Age-specific  
462 patterns of genetic variance in *Drosophila melanogaster*. I. Mortality.  
463 *Genetics* **143**, 839–48 (1996).
- 464 18. Bronikowski, A. M. *et al.* The aging baboon: Comparative demography in a  
465 non-human primate. *Proc. Natl. Acad. Sci.* **99**, 9591–9595 (2002).
- 466 19. Oeppen, J. & Vaupel, J. W. Demography: Broken limits to life expectancy.

- 467            *Science* **296**, 1029–1031 (2002).
- 468    20.    Vaupel, J. W. Biodemography of human ageing. *Nature* **464**, 536–542  
469            (2010).
- 470    21.    Stearns, S. C. Trade-Offs in Life-History Evolution. *Funct. Ecol.* **3**, 259–268  
471            (1989).
- 472    22.    Sæther, B.-E. *et al.* Generation time and temporal scaling of bird population  
473            dynamics. *Nature* **436**, 99–102 (2005).
- 474    23.    Matthysen, E. Density-dependent dispersal in birds and mammals.  
475            *Ecography* **28**, 403–416 (2005).
- 476    24.    Schroeder, J., Nakagawa, S., Rees, M., Mannarelli, M.-E. & Burke, T. Reduced  
477            fitness in progeny from old parents in a natural population. *Proc. Natl.*  
478            *Acad. Sci.* **112**, 4021–4025 (2015).
- 479    25.    Simons, M. J. P., Winney, I., Nakagawa, S., Burke, T. & Schroeder, J. Limited  
480            catching bias in a wild population of birds with near-complete census  
481            information. *Ecol. Evol.* **5**, 3500–3506 (2015).
- 482    26.    Girndt, A., Chng, C. W. T., Burke, T. & Schroeder, J. Male age is associated  
483            with extra-pair paternity, but not with extra-pair mating behaviour. *Sci.*  
484            *Rep.* **8**, 8378 (2018).
- 485    27.    Schroeder, J. *et al.* Predictably Philandering Females Prompt Poor Paternal  
486            Provisioning. *Am. Nat.* **188**, 219–230 (2016).
- 487    28.    Winney, I. S. *et al.* Heritability and social brood effects on personality in  
488            juvenile and adult life-history stages in a wild passerine. *J. Evol. Biol.* **31**,  
489            75–87 (2018).
- 490    29.    Laucht, S., Kempnaers, B. & Dale, J. Bill color, not badge size, indicates  
491            testosterone-related information in house sparrows. *Behav. Ecol. Sociobiol.*

- 492           **64**, 1461–1471 (2010).
- 493    30.   Colchero, F., Jones, O. R. & Rebke, M. BaSTA: An R package for Bayesian  
494           estimation of age-specific survival from incomplete mark-  
495           recapture/recovery data with covariates. *Methods Ecol. Evol.* **3**, 466–470  
496           (2012).
- 497    31.   Colchero, F. & Clark, J. S. Bayesian inference on age-specific survival for  
498           censored and truncated data. *J. Anim. Ecol.* **81**, 139–149 (2012).
- 499    32.   Pletcher, S. D., Khazaeli, A. A. & Curtsinger, J. W. Why Do Life Spans Differ?  
500           Partitioning Mean Longevity Differences in Terms of Age-Specific Mortality  
501           Parameters. *Journals Gerontol. Ser. A Biol. Sci. Med. Sci.* **55**, B381–B389  
502           (2000).
- 503    33.   Clutton-Brock, T. . & Isvaran, K. Sex differences in ageing in natural  
504           populations of vertebrates. *Proc. R. Soc. B Biol. Sci.* **274**, 3097–3104  
505           (2007).
- 506    34.   Jackson, C. flexsurv : A Platform for Parametric Survival Modeling in R. *J.*  
507           *Stat. Softw.* **70**, 1–33 (2016).
- 508    35.   Yalden, D. W. Notes on the diet of urban kestrels. *Bird Study* **27**, 235–238  
509           (1980).
- 510    36.   Gavrilova, N. S. & Gavrilov, L. A. Biodemography of old-age mortality in  
511           humans and rodents. *Journals Gerontol. - Ser. A Biol. Sci. Med. Sci.* **70**, 1–9  
512           (2015).
- 513    37.   Tuljapurkar, S. An uncertain life: Demography in random environments.  
514           *Theor. Popul. Biol.* **35**, 227–294 (1989).
- 515    38.   Benton, T. G. & Grant, A. How to Keep Fit in the Real World: Elasticity  
516           Analyses and Selection Pressures on Life Histories in a Variable

- 517 Environment. *Am. Nat.* **147**, 115–139 (1996).
- 518 39. Kirkwood, T. B. L. & Rose, M. R. Evolution of Senescence: Late Survival  
519 Sacrificed for Reproduction. *Philos. Trans. R. Soc. B Biol. Sci.* **332**, 15–24  
520 (1991).
- 521 40. Waxman, D. & Peck, J. R. Sex and adaptation in a changing environment.  
522 *Genetics* **153**, 1041–1053 (1999).
- 523 41. Childs, D. Z., Metcalf, C. J. E. & Rees, M. Evolutionary bet-hedging in the real  
524 world: empirical evidence and challenges revealed by plants. *Proc. R. Soc. B*  
525 *Biol. Sci.* **277**, 3055–3064 (2010).
- 526 42. Kowald, A. & Kirkwood, T. B. L. Evolutionary significance of ageing in the  
527 wild. *Exp. Gerontol.* **71**, 89–94 (2015).
- 528 43. Rees, M., Childs, D. Z., Rose, K. E. & Grubb, P. J. Evolution of size-dependent  
529 flowering in a variable environment: construction and analysis of a  
530 stochastic integral projection model. *Proceedings. Biol. Sci.* **271**, 425–34  
531 (2004).
- 532 44. Ricklefs, R. E., Scheuerlein, A. & Cohen, A. Age-related patterns of fertility  
533 in captive populations of birds and mammals. *Exp. Gerontol.* **38**, 741–745  
534 (2003).
- 535 45. Burger, J. M. S. & Promislow, D. E. L. Are functional and demographic  
536 senescence genetically independent? *Exp. Gerontol.* **41**, 1108–1116 (2006).
- 537 46. Gavrilov, L. A. & Gavrilova, N. S. The reliability theory of aging and  
538 longevity. *J. Theor. Biol.* **213**, 527–545 (2001).
- 539 47. Boonekamp, J. J., Simons, M. J. P., Hemerik, L. & Verhulst, S. Telomere  
540 length behaves as biomarker of somatic redundancy rather than biological  
541 age. *Aging Cell* **12**, 330–332 (2013).

- 542 48. Mair, W., Goymer, P., Pletcher, S. D. & Partridge, L. Demography of dietary  
543 restriction and death in *Drosophila*. *Science* **301**, 1731–3 (2003).
- 544 49. McCracken, A. W., Adams, G., Hartshorne, L. & Simons, M. J. P. The hidden  
545 costs of dietary restriction: implications for its evolutionary and  
546 mechanistic origins. *bioRxiv Preprint*, doi:10.1101/533711 (2019).
- 547 50. Grunst, M. L. *et al.* Actuarial senescence in a dimorphic bird: different rates  
548 of ageing in morphs with discrete reproductive strategies. *Proc. R. Soc. B*  
549 *Biol. Sci.* **285**, 20182053 (2018).
- 550 51. Hammers, M. *et al.* Breeders that receive help age more slowly in a  
551 cooperatively breeding bird. doi:10.1038/s41467-019-09229-3
- 552 52. Roach, D. A. & Gampe, J. Age-Specific Demography in *Plantago* : Uncovering  
553 Age-Dependent Mortality in a Natural Population. *Am. Nat.* **164**, 60–69  
554 (2004).
- 555 53. Ricklefs, R. E. Evolutionary Theories of Aging: Confirmation of a  
556 Fundamental Prediction, with Implications for the Genetic Basis and  
557 Evolution of Life Span. *Am. Nat.* **152**, 24–44 (1998).
- 558 54. Turbill, C. & Ruf, T. Senescence is more important in the natural lives of  
559 long- than short-lived mammals. *PLoS One* **5**, (2010).
- 560 55. Garratt, M., Nakagawa, S. & Simons, M. J. P. Life-span Extension With  
561 Reduced Somatotrophic Signaling: Moderation of Aging Effect by Signal  
562 Type, Sex, and Experimental Cohort. *J. Gerontol. A. Biol. Sci. Med. Sci.* **72**,  
563 1620–1626 (2017).
- 564 56. Partridge, L., Pletcher, S. D. & Mair, W. Dietary restriction, mortality  
565 trajectories, risk and damage. *Mech. Ageing Dev.* **126**, 35–41 (2005).
- 566 57. Blaker, H. Confidence curves and improved exact confidence intervals for



567 discrete distributions. *Can. J. Stat.* **28**, 783–798 (2000).

568

569

570 **Tables**

571

572 **Table 1.** Comparison of parametric survival models of the wild house sparrows  
573 on Lundy. The first three variables parameterise the bathtub shape ( $a_0$ ,  $a_1$  and  $c$ ;  
574 Figure 1). The b set of adult mortality senescence parameters are defined  
575 accordingly (see text and Equation 1 and 2).

| Parameter              | Gompertz (95% CI)        | Logistic (95% CI)        |
|------------------------|--------------------------|--------------------------|
| $a_0$                  | 0.378 (0.150 : 0.640)    | 0.407 (0.199 : 0.633)    |
| $a_1$                  | 1.923 (1.220 : 2.876)    | 1.599 (0.944 : 2.530)    |
| $c$                    | 0.356 (0.095 : 0.526)    | 0.285 (0.042 : 0.499)    |
| $b_0$ ('frailty')      | -2.690 (-4.368 : -1.322) | -3.224 (-4.778 : -1.828) |
| $b_1$ ('ageing rate')  | 0.327 (0.154 : 0.548)    | 0.749 (0.338 : 1.282)    |
| $b_2$ ('deceleration') |                          | 1.045 (0.144 : 2.212)    |
| DIC                    | 6537                     | 6504                     |

576

577

578 **Table 2.** Gompertz fits of adult mortality in the captive and wild population. Note  
579 the high similarity in the ageing rate parameter ( $b_1$ ) and the substantial  
580 difference in the frailty parameter ( $b_0$ ). Refer to Figure 2 for a plot of the models.

| Gompertz Parameter    | Captive (95% CI)         | Wild (95% CI)            |
|-----------------------|--------------------------|--------------------------|
| $b_0$ ('frailty')     | -3.117 (-3.461 : -2.769) | -1.309 (-1.423 : -1.194) |
| $b_1$ ('ageing rate') | 0.203 (0.127 : 0.270)    | 0.228 (0.188 : 0.268)    |

581

582 **Table 3.** Estimates from the mixed binomial models, including census year as a  
583 random effect, either testing the three environmental variables together in a full  
584 model or separately, run for juvenile and adult mortality separately. Raw  
585 estimates of scaled variables are given with their standard errors. \*\* indicates  $p <$   
586 0.01, \* indicates  $p < 0.05$ , † indicates  $p < 0.1$ . Models of adult mortality included  
587 age to correct for differences in age demography and its associated mortality  
588 between years.

|                        | <b>Juvenile mortality</b> |               | <b>Adult mortality</b> |               |
|------------------------|---------------------------|---------------|------------------------|---------------|
|                        | full model                | separate      | full model             | separate      |
| <b>cold days</b>       | -0.23 ± 0.19              | -0.41 ± 0.18* | -0.12 ± 0.24           | -0.41 ± 0.25† |
| <b>population size</b> | 0.19 ± 0.17               | 0.35 ± 0.19†  | 0.13 ± 0.22            | 0.30 ± 0.27   |
| <b>predator index</b>  | 0.21 ± 0.18               | 0.34 ± 0.18†  | 0.56 ± 0.24*           | 0.65 ± 0.23** |

589

590 **Figure legends**

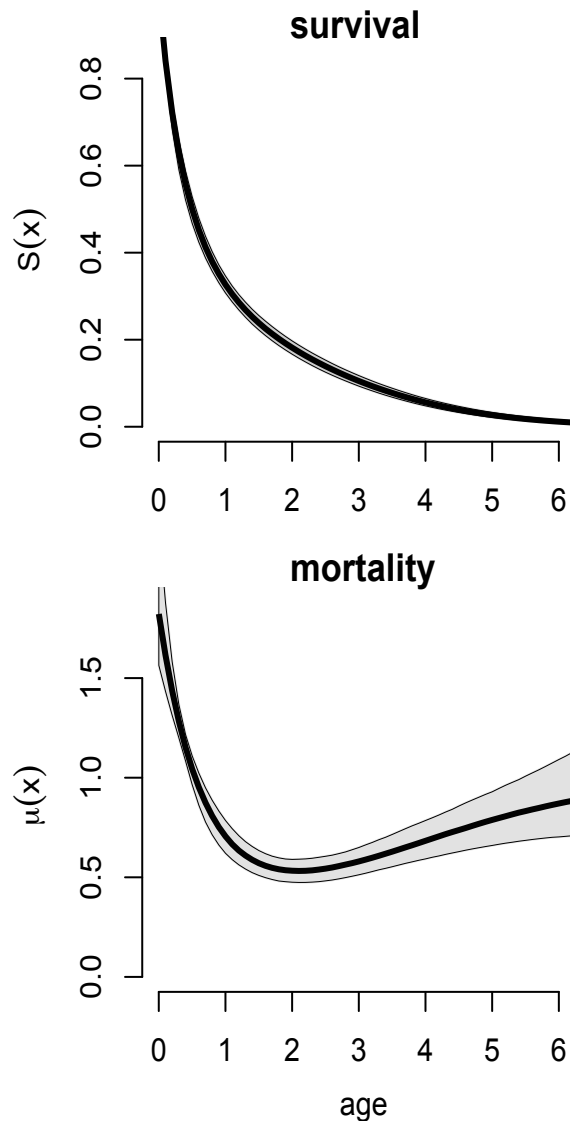

591

592 **Figure 1.** Fitted survival (top) and mortality (bottom) from the preferred model  
593 (Logistic, table 1) from day 12 (age 0) up to age 6, after which most individuals in  
594 the wild population have died. The grey shaded area indicates the 95%  
595 confidence interval around the estimate (solid line).

596

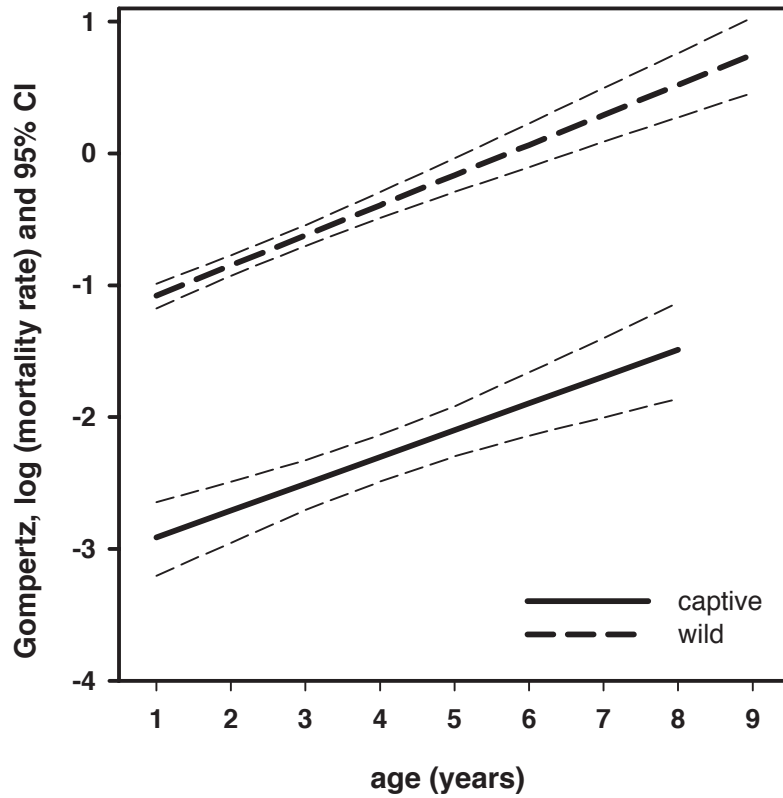

597

598 **Figure 2.** Fitted mortality rates under a Gompertz model of house sparrows in  
599 the wild and in captivity. Model predictions are plotted across the full range of  
600 ages available in the datasets.

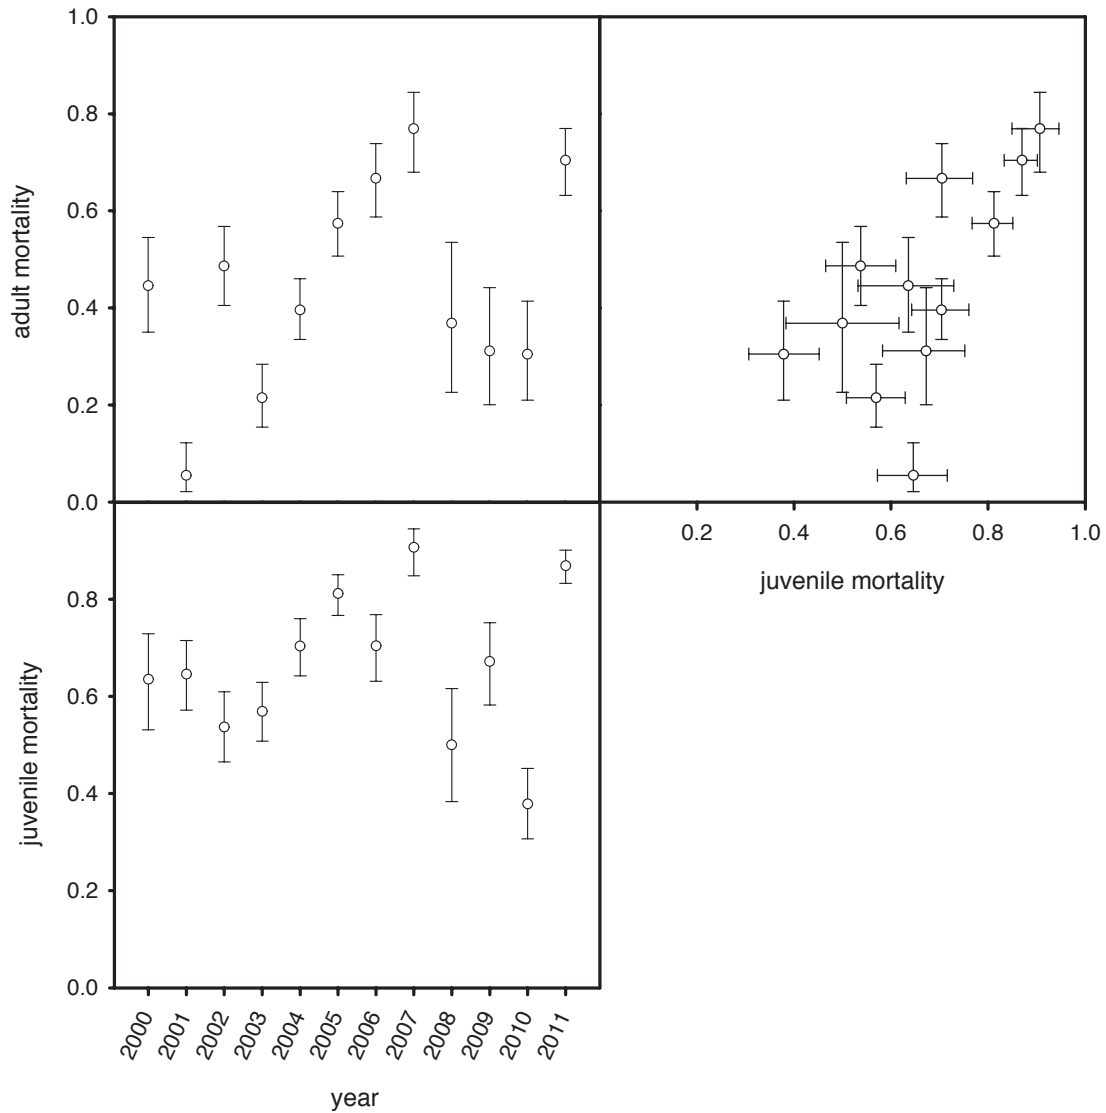

601

602 **Figure 3.** Variation in adult and juvenile mortality rates per census year (two  
603 graphs on left) and the correlation between these (top right graph). Whiskers  
604 indicate confidence intervals of proportions according to Blaker<sup>57</sup>, calculated  
605 using the package 'PropCIs' in R.

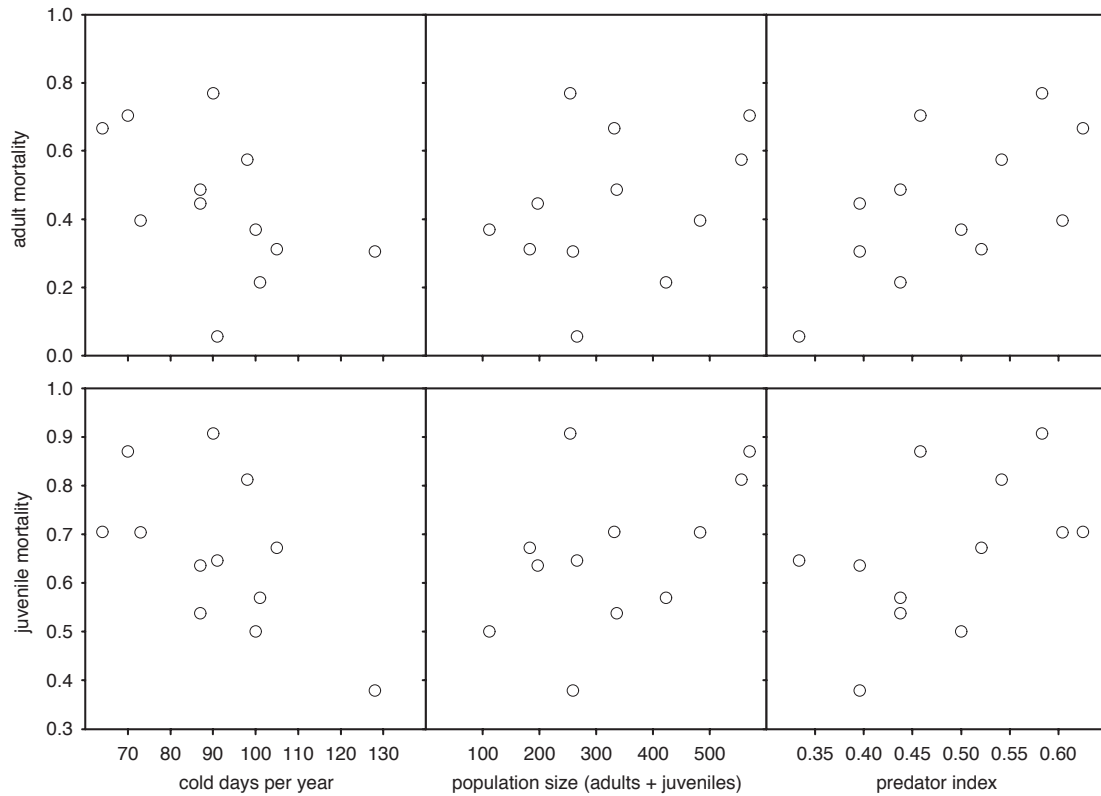

606

607 **Figure 4.** Scatter plots between adult or juvenile mortality and temperature,  
608 population size or the presence of raptors. Significant relationships were present  
609 between predation pressure and both juvenile and adult mortality, and mortality  
610 of both juveniles and adults was higher in warmer winters. See text for rank  
611 correlations of these relationships and Table 3 for binomial mixed models.
